# Supplementary material
Source: PubMed Central journal article supplement (PMC10125639)
Supplement: jasn-34-886-s001.pdf [file jasn-34-886-s001.pdf]

**The Effect of Magnesium Supplementation on Vascular Calcification in Chronic Kidney Disease - A Randomized Clinical Trial (MAGiCAL-CKD)**

Iain Bressendorff, Ditte Hansen, Morten Schou, Charlotte Kragelund, My Svensson, Bahram Hashemi, Tilde Kristensen, Marie Houmaa Vrist, Rikke Borg, Birgitte Tougaard, Kristine Borg, Henrik Øder Hjortkjær, Cathrine Helgestad Kristiansen, Nicholas Carlson, Mohammad Nasiri, Haseem Ashraf, Andreas Pasch, Lisbet Brandt

**Supplemental Material:**

**Supplementary figure 1 – Effect of magnesium supplementation on CAC score in subgroups:**

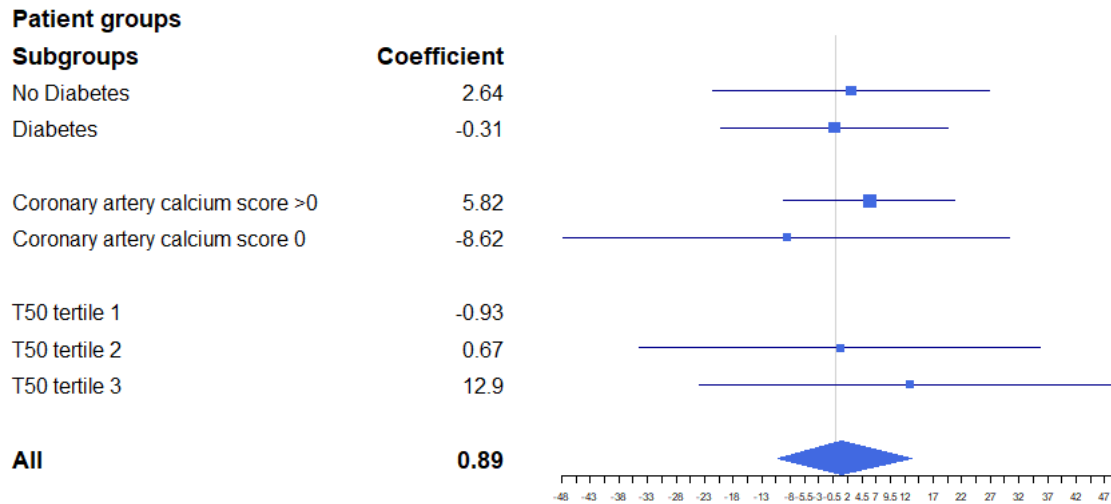

**Supplementary figure 2 – Longitudinal effects of magnesium on kidney function and potassium:**

Analysis of changes over time in the serial measurements of estimated glomerular filtration rate and plasma potassium using linear mixed models with basic random intercept and compound symmetry covariance structure.

Error bars represent mean and standard deviation or median and interquartile range, as relevant.

eGFR, estimated glomerular filtration rate; K, potassium.

● = placebo (n = 73), ○ = magnesium (n = 75)

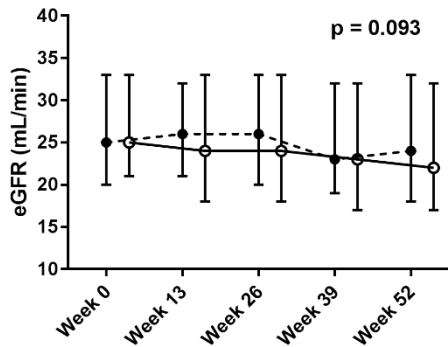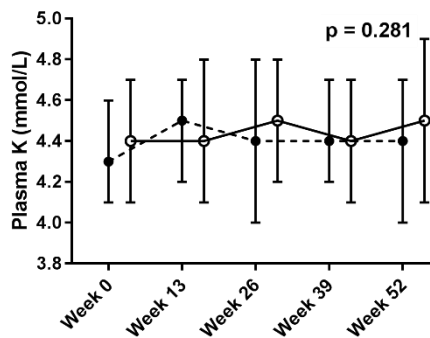

### Supplementary figure 3:

Log coronary artery calcification score at 52 weeks and baseline in age-grouped participants with stratification on diabetes and treatment

Age-tertile 1:

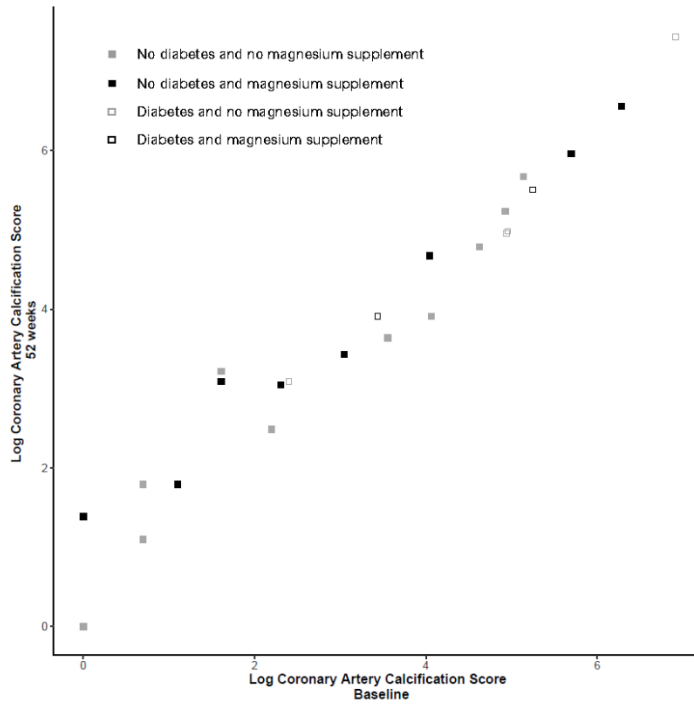

Age-tertile 2:

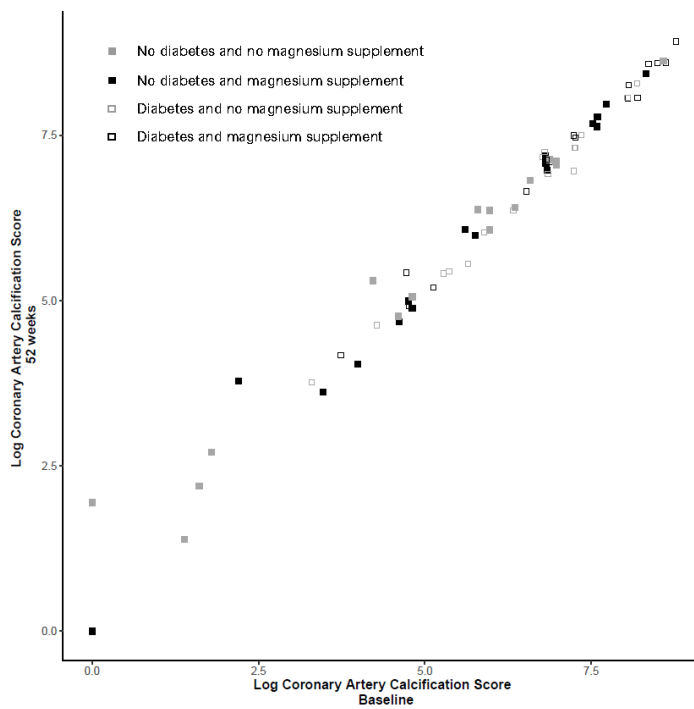

Age-tertile 3:

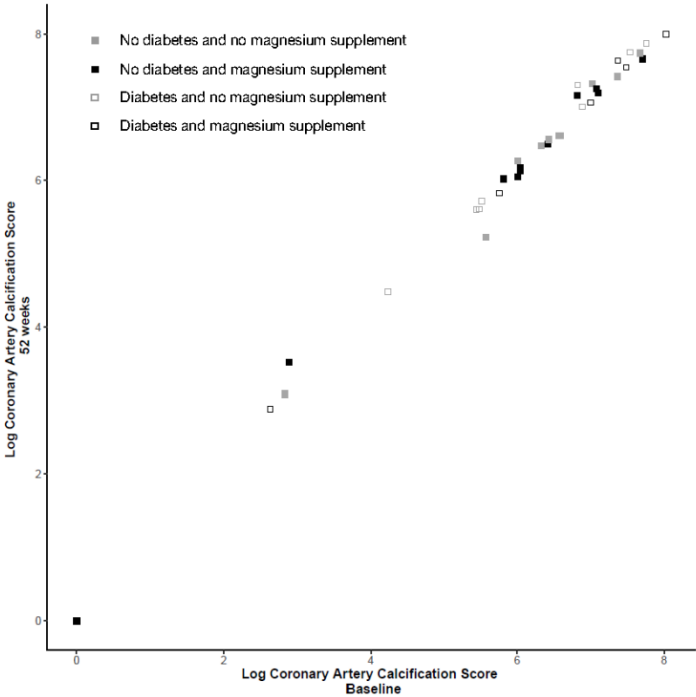

**Supplementary figure 4:**

Effect plots stratified on treatment with magnesium supplement and placebo.

Indexed on individual participant

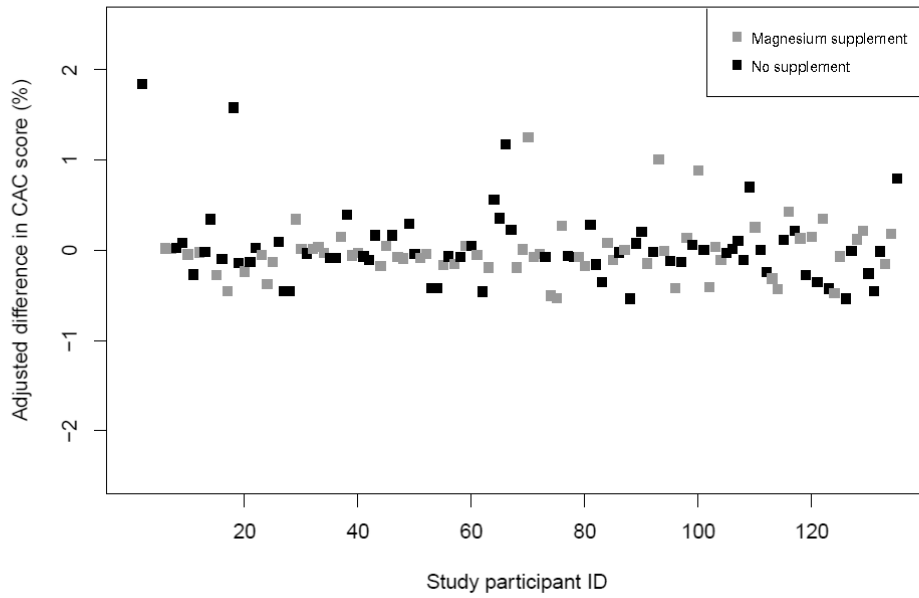

Indexed on Coronary Artery Calcification Score at baseline

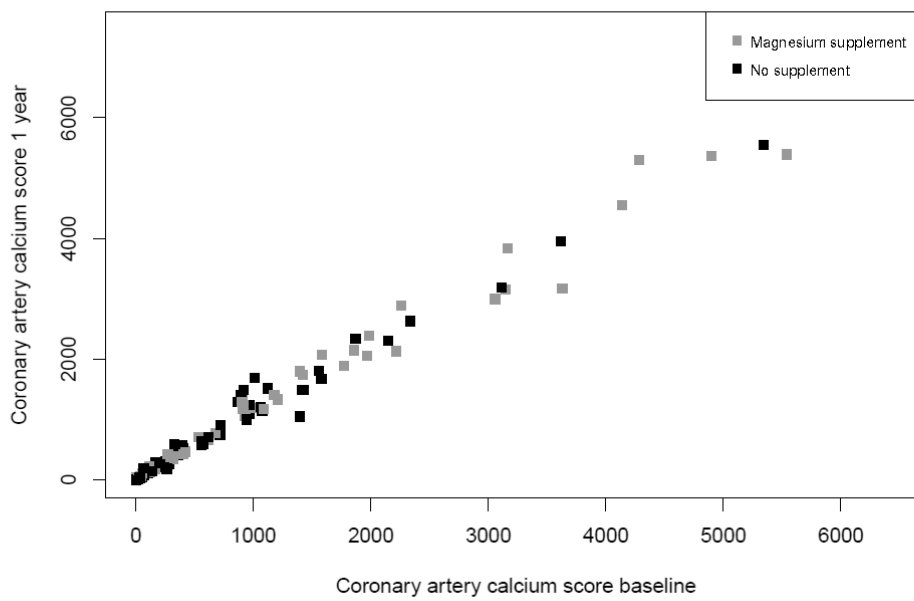

**Supplementary table 1 - Serious Adverse Events**

| Magnesium                                                                              |                      |                         | Placebo                           |               |                         |
|----------------------------------------------------------------------------------------|----------------------|-------------------------|-----------------------------------|---------------|-------------------------|
| Event                                                                                  | Time of event (week) | Last measured plasma Mg | Event                             | Time of event | Last measured plasma Mg |
| <b>Death</b>                                                                           |                      |                         | <b>Death</b>                      |               |                         |
| 6 (4 cardiovascular cause, 1 cancer)                                                   |                      |                         | 2 (1 unknown cause, 1 cancer)     |               |                         |
| <b>Cardiovascular events</b>                                                           |                      |                         | <b>Cardiovascular events</b>      |               |                         |
| 6                                                                                      |                      |                         |                                   |               |                         |
| Heart failure, died week 34, CAC score 402                                             | 18                   | 1.03                    |                                   |               |                         |
| Stroke secondary to bacterial meningitis, partially resolved, CAC score 2              | 49                   | 0.98                    |                                   |               |                         |
| Sudden death, likely myocardial infarction or stroke, CAC score 3453                   | 3                    | 0.70                    |                                   |               |                         |
| Sudden death, likely myocardial infarction, CAC score 2860                             | 36                   | 0.86                    |                                   |               |                         |
| Massive ischemic stroke, died week 40, CAC score 2231                                  | 20                   | 0.87                    |                                   |               |                         |
| Sudden death, unknown cause, CAC score 1407                                            | 17                   | 0.75                    |                                   |               |                         |
|                                                                                        |                      |                         |                                   |               |                         |
| <b>Cancer</b>                                                                          |                      |                         | <b>Cancer</b>                     |               |                         |
| Carcinoid tumor with metastases to liver discovered on CT scan at week 0, died week 33 | 33                   | 0.78                    | Tongue cancer, radiotherapy       | 41            | 0.76                    |
|                                                                                        |                      |                         | Pancreatic cancer, died week 51   | 45            | 0.80                    |
|                                                                                        |                      |                         | Lung cancer, lobectomy            | 30            | 0.99                    |
|                                                                                        |                      |                         |                                   |               |                         |
| <b>Infection</b>                                                                       |                      |                         | <b>Infection</b>                  |               |                         |
| Pneumonia, resolved                                                                    | 14                   | 1.03                    | Urinary tract infection, resolved | 16            | 1.01                    |
| Influenza, resolved                                                                    | 49                   | 0.96                    | Diverticulitis, resolved          | 9             | 0.90                    |
| Infection in toe, resolved                                                             | 34                   | 0.86                    | Urinary tract infection, resolved | 43            | 0.86                    |
| Bacterial meningitis, resolved                                                         | 47                   | 0.98                    | Pneumonia, resolved               | 20            | 0.86                    |
| Bacterial gastroenteritis, resolved                                                    | 24                   | 1.02                    |                                   |               |                         |
| Sepsis, resolved                                                                       | 18                   | 0.83                    |                                   |               |                         |
| Urinary tract infection, resolved                                                      | 37                   | 0.88                    |                                   |               |                         |
| <b>Gout attack</b>                                                                     |                      |                         | <b>Gout attack</b>                |               |                         |
| 6                                                                                      |                      |                         | 1                                 |               |                         |
| <b>Other</b>                                                                           |                      |                         | <b>Other</b>                      |               |                         |
| Pulmonary congestion, resolved                                                         | 6                    | 0.98                    | Fall, fractured elbow, resolved   | 15            | 0.70                    |
| Pancreatitis, resolved                                                                 | 30                   | 0.86                    | Syncope, resolved                 | 6             | 0.72                    |
| Plural effusion x 3, resolved                                                          | 10,11 and 13         | 0.69                    | Gastrointestinal bleed, resolved  | 41            | 0.80                    |
| Pulmonary congestion, died during admission                                            | 36                   | 0.86                    | Syncope, fractured nose, resolved | 39            | 0.75                    |
